# Supplementary material for: An optimized electroporation approach for efficient CRISPR/Cas9 genome editing in murine zygotes
Source: PubMed Central journal article supplement (PMC5933690; doi:10.1371/journal.pone.0196891), 2018-05-03

## S2 Figure

### A

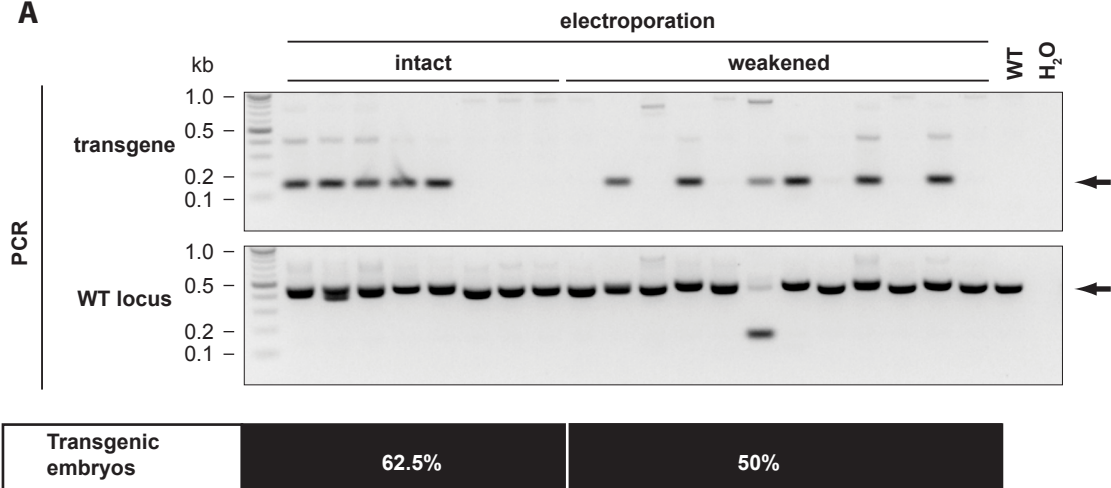

### B

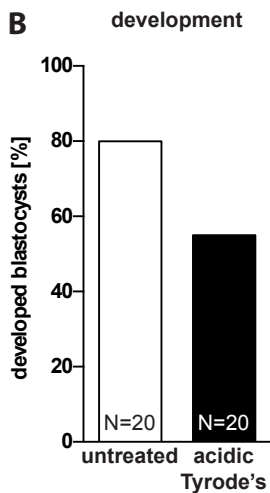

### C editing efficiency *Tmem218* in vitro

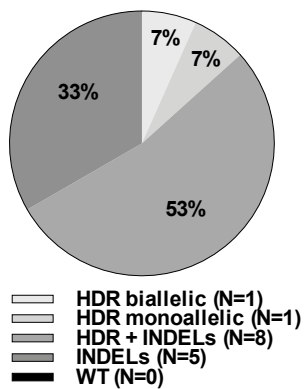

### D editing efficiency *Lyn* in vivo (C57BL6/J)

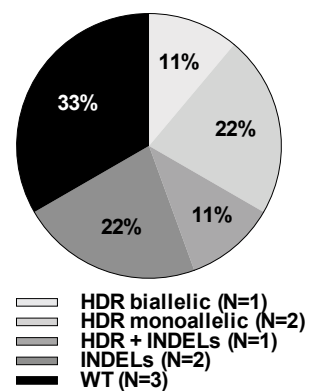

Supplement: pone.0196891.s002.pdf [file pone.0196891.s002.pdf]
