# Supplementary material for: An optimized electroporation approach for efficient CRISPR/Cas9 genome editing in murine zygotes
Source: PubMed Central journal article supplement (PMC5933690; doi:10.1371/journal.pone.0196891), 2018-05-03

### S3 Figure

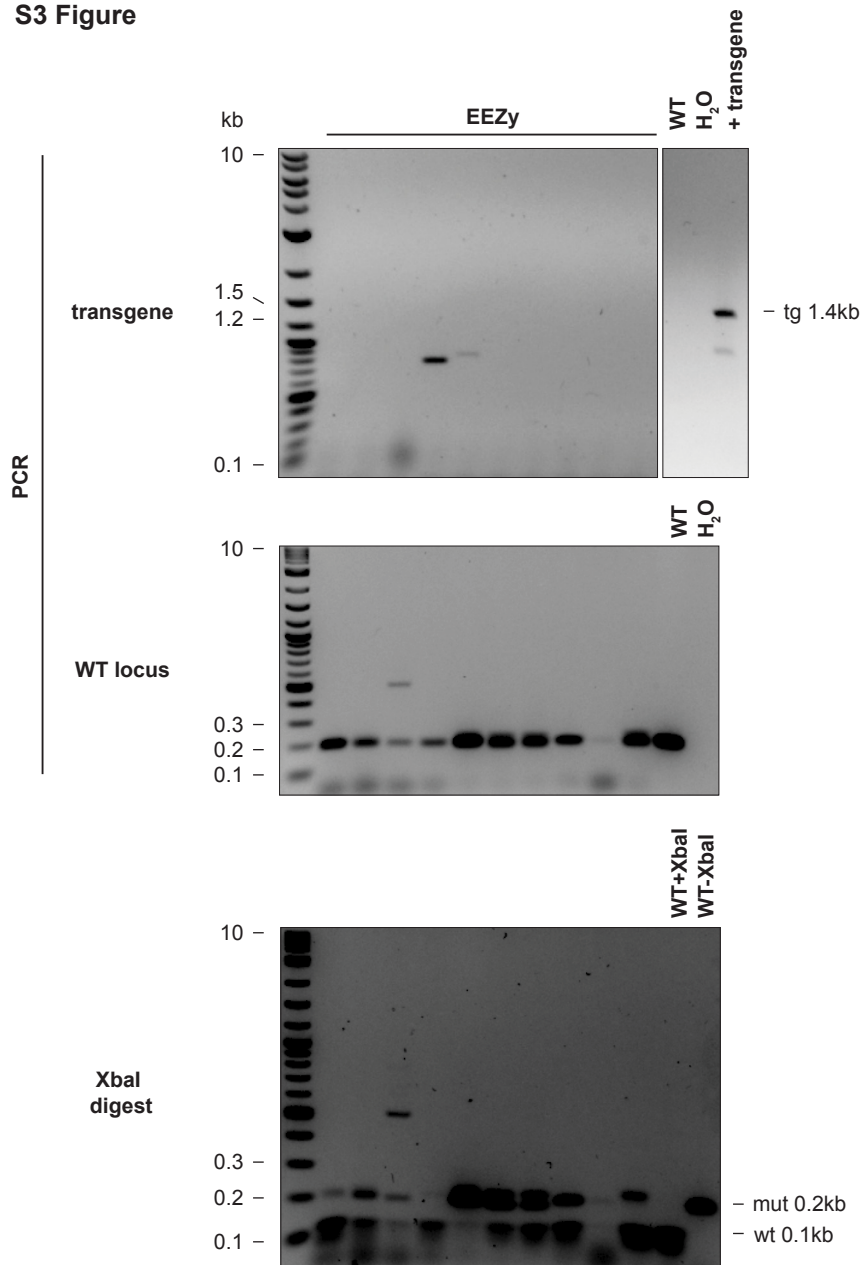

Supplement: pone.0196891.s003.pdf [file pone.0196891.s003.pdf]
