# Supplementary material for: An optimized electroporation approach for efficient CRISPR/Cas9 genome editing in murine zygotes
Source: PubMed Central journal article supplement (PMC5933690; doi:10.1371/journal.pone.0196891), 2018-05-03
Supplement: pone.0196891.s005.pdf [file pone.0196891.s005.pdf]

## S1 Table. Sequences of oligonucleotides used in this study

### S1A Table. Sequences of guide RNA and DNA repair templates

| Target                          | Guide RNA sequence (5'-3') | DNA repair template sequence (5'-3')                                                                                                                             |
|---------------------------------|----------------------------|------------------------------------------------------------------------------------------------------------------------------------------------------------------|
| <i>Nphs2</i>                    | UUUCCAGGAGAAUUUCAGUG       | CTTCTTCTAAGCAGTCTAGCCCATGTGTCCAAAGCCATCCAGT<br>TCCTGGTGCAAACCACCATGAAGCGCCTCTTGGCACATCGGT<br>CTCTCATTGAAATTCTCCTGGAAAGGAAGAGCATTGCCCAAG<br>A                     |
| <i>Atp1a1</i>                   | CAUCCGAAGUGCUACAGAAG       | TCTGGGAGGCAACAGCGCTACCGTAACACTACACAACACTCACATC<br>ATCGTTTGGCGGTTCTCCAGATCCTTCTGAGATGAGTTTT<br>TGTTCTGTAGCACTTCGGATGCCATAAGCCAGGAAACAAAGA<br>ATGGCCCCGATCCACAGTAA |
| <i>Lyn</i>                      | CAGACAUGGUGCCGGGCUUG       | TTTAGGAGGTGCAGTGCTTGAGTTCTCTGCTTTCTTTGTCTG<br>CCCAGGTTACTATAACAACAGCACAAAGGTGGCTGTGAGGAC<br>ACTTAAGCCCCGGCACCATGTCTGTGCAGGCATTCTCTGGAAGA                         |
| <i>Gt(ROSA)</i><br><i>26Sor</i> | ACUCCAGUCUUUCUAGAAGA       | SA-Venus targeting vector                                                                                                                                        |

### S1B Table. PCR and sequencing primer and thermocycling conditions

|                                                | Primer sequence (5'-3')                                              | Conditions                                                                 | PCR rounds      |
|------------------------------------------------|----------------------------------------------------------------------|----------------------------------------------------------------------------|-----------------|
| <i>Atp1a1</i><br>[nested]                      | fwd: GGTCTTAGGGCATTACGGGCT<br>rev: GACGACGACATCCTCCGCAT              | 98°C 3min; 34 cycles of<br>[95°C-20s; 59°C-20s;<br>72°C-30s]; 72°C-3 min   | 1 <sup>st</sup> |
| <i>Atp1a1</i><br>[WT]                          | fwd: CCTCCCACTACTCCCGAAT<br>rev: TCTCCTAGGTGAGTCGATTTCT              | 98°C 3min; 30 cycles of<br>[95°C-20s; 55°C-20s;<br>72°C-20s]; 72°C-3 min   | 2 <sup>nd</sup> |
| <i>Atp1a1</i><br>[myc]                         | fwd: CCTCCCACTACTCCCGAAT<br>rev: CCTCCAGATCCTTCTGAGAT                | 98°C 3min; 30 cycles of<br>[95°C-20s; 55°C-20s;<br>72°C-20s]; 72°C-3 min   | 2 <sup>nd</sup> |
| <i>Nphs2</i>                                   | fwd: AGACGCTGTCTGCTACTACCGC<br>rev: TCCCCAGGCCAATGATGTCAC            | 98°C 3min; 34 cycles of<br>[95°C-20s; 67.5°C-20s;<br>72°C-20s]; 72°C-3 min | 2               |
| <i>Gt(ROSA)</i><br><i>26Sor</i><br>[nested]    | fwd: CTCGGCTAGGTAGGGGATCG<br>rev: GCATTCCAAAAGGAACCACTT              | 98°C 3min; 38 cycles of<br>[95°C-20s; 61.5°C-20s;<br>72°C-90s]; 72°C-3 min | 1 <sup>st</sup> |
| <i>Gt(ROSA)</i><br><i>26Sor</i><br>[WT]        | fwd: GCCTCCTGGCTTCTGAGGACCG<br>rev: TCTGTGGGAAGTCTTGCCCTCC           | 98°C 3min; 38 cycles of<br>[95°C-20s; 66.5°C-20s;<br>72°C-20s]; 72°C-3 min | 2 <sup>nd</sup> |
| <i>Gt(ROSA)</i><br><i>26Sor</i><br>[transgene] | fwd: GGCTCTCGAGCCTCTAGAACTATAGTG<br>rev: CAAGCTCACAAAGACCTTAGGTCAGGA | 98°C 3min; 38 cycles of<br>[95°C-20s; 62°C-20s;<br>72°C-45s]; 72°C-3 min   | 1               |
| <i>Lyn</i>                                     | fwd: GCAGTGGACAATCTCCCAAGAC<br>rev: TCTCAGCACACTCTAATCCGA            | 98°C 3min; 34 cycles of<br>[95°C-20s; 64.5°C-20s;<br>72°C-45s]; 72°C-3 min | 1               |
| <i>Nphs2</i>                                   | fwd: AGACGCTGTCTGCTACTACCGC                                          | Sanger sequencing                                                          | N.A.            |
| <i>Lyn</i>                                     | fwd: CTCCTTAGGGGTACAGACT                                             | Sanger sequencing                                                          | N.A.            |
