# Supplementary material for: An optimized electroporation approach for efficient CRISPR/Cas9 genome editing in murine zygotes
Source: PubMed Central journal article supplement (PMC5933690; doi:10.1371/journal.pone.0196891), 2018-05-03
Supplement: pone.0196891.s006.pdf [file pone.0196891.s006.pdf]

**Fig 1B**

| no additives |       | additives  |       |
|--------------|-------|------------|-------|
| transgenic   | total | transgenic | total |
| 5            | 12    | 7          | 12    |
| 11           | 17    | 8          | 17    |
| 6            | 13    | 3          | 9     |

**Fig 1C**

| no additives |       | additives   |       |
|--------------|-------|-------------|-------|
| blastocysts  | total | blastocysts | total |
| 13           | 25    | 12          | 23    |
| 17           | 22    | 17          | 25    |
| 13           | 15    | 9           | 14    |

**Fig 1D**

| natural mating |       |            |       | IVF        |       |
|----------------|-------|------------|-------|------------|-------|
| pgRNA          |       | sgRNA      |       | pgRNA      |       |
| transgenic     | total | transgenic | total | transgenic | total |
| 6              | 9     | 1          | 3     | 5          | 8     |
| 3              | 6     | 2          | 3     | 8          | 9     |
| 10             | 13    | 2          | 11    | 8          | 11    |

**Fig 1E**

| natural mating |       |             |       | IVF         |       |
|----------------|-------|-------------|-------|-------------|-------|
| pgRNA          |       | sgRNA       |       | pgRNA       |       |
| blastocysts    | total | blastocysts | total | blastocysts | total |
| 9              | 11    | 3           | 11    | 8           | 16    |
| 6              | 10    | 3           | 9     | 9           | 15    |
| 13             | 15    | 11          | 24    | 11          | 17    |

**Fig 1F**

| sgRNA |             | pgRNA |             |
|-------|-------------|-------|-------------|
| total | blastocysts | total | blastocysts |
| 39    | 15          | 17    | 8           |
| 34    | 9           | 17    | 10          |
| 23    | 12          | 16    | 5           |
| 27    | 8           | 16    | 5           |

**S2B Fig**

|                 | total | blastocysts |
|-----------------|-------|-------------|
| untreated       | 20    | 16          |
| acidic Tyrode's | 20    | 11          |

**Fig 2A**

| + pronuclei | - pronuclei |
|-------------|-------------|
| 109         | 65          |
| 143         | 31          |
| 128         | 31          |
| 122         | 49          |
| 177         | 85          |
| 220         | 50          |
| 135         | 48          |
| 120         | 63          |
| 147         | 144         |
| 121         | 22          |
| 116         | 42          |
| 233         | 49          |
| 94          | 51          |
| 200         | 76          |
| 107         | 34          |
| 182         | 142         |
| 187         | 64          |
| 92          | 9           |
| 108         | 62          |
| 160         | 28          |
| 82          | 50          |
| 170         | 92          |
| 181         | 108         |
| 147         | 103         |
| 142         | 29          |
| 95          | 71          |
| 91          | 50          |
| 224         | 161         |
| 151         | 79          |
| 164         | 77          |
| 177         | 147         |
| 155         | 131         |
| 134         | 49          |
| 93          | 118         |
| 117         | 146         |
| 132         | 205         |
| 152         | 135         |
| 77          | 34          |
| 35          | 7           |
| 153         | 25          |
| 128         | 24          |
| 92          | 64          |
| 167         | 106         |
| 110         | 39          |
| 51          | 51          |
| 52          | 1           |
| 195         | 67          |

**Fig 2C**

| - pronuclei |            |
|-------------|------------|
| total       | transgenic |
| 4           | 3          |
| 6           | 4          |
| 8           | 5          |

**Fig 2D**

| - pronuclei |             |
|-------------|-------------|
| total       | blastocysts |
| 36          | 4           |
| 39          | 6           |
| 30          | 8           |

**Fig 3A**

|               | <b>blastocysts</b> | <b>total</b> | <b>blastocysts</b> | <b>total</b> | <b>blastocysts</b> | <b>total</b> |
|---------------|--------------------|--------------|--------------------|--------------|--------------------|--------------|
| -             | 32                 | 40           | 16                 | 20           | 39                 | 39           |
| <b>Mock</b>   | 22                 | 27           | 20                 | 28           | 14                 | 20           |
| <b>CRISPR</b> | 27                 | 40           | 21                 | 26           | 12                 | 20           |

**Fig 3B-D**

| <b>PNI</b>     |               |                    | <b>EEZy</b>    |               |                    |
|----------------|---------------|--------------------|----------------|---------------|--------------------|
| <b>initial</b> | <b>viable</b> | <b>blastocysts</b> | <b>initial</b> | <b>viable</b> | <b>blastocysts</b> |
| 20             | 17            | 8                  | 20             | 20            | 11                 |
| 20             | 17            | 10                 | 20             | 19            | 13                 |
| 20             | 16            | 5                  | 20             | 18            | 11                 |
| 21             | 16            | 5                  | 20             | 19            | 13                 |

**Fig 3D**

| <b>PNI</b>   |                   |
|--------------|-------------------|
| <b>total</b> | <b>transgenic</b> |
| 8            | 5                 |
| 10           | 0                 |
| 5            | 2                 |
| 4            | 1                 |

Depicted are numbers of embryos
