# Supplementary material for: An optimized electroporation approach for efficient CRISPR/Cas9 genome editing in murine zygotes
Source: PLoS One. 2018 May 3;13(5):e0196891. doi: 10.1371/journal.pone.0196891 (PMC5933690; doi:10.1371/journal.pone.0196891)

S1 Figure

*Bsal* site  
CATGAAGCGCCTCTTGGCACATC**gT**CtCTC *Nphs2* targeted locus

CATGAAGCGCCTCTTGGCACATCG**AT**C**C**CCTC *Nphs2* WT locus

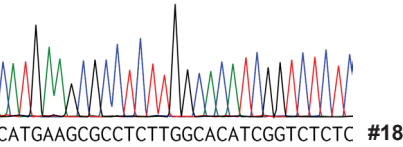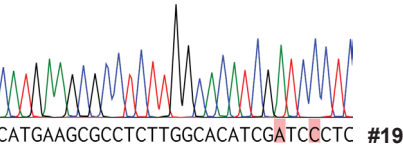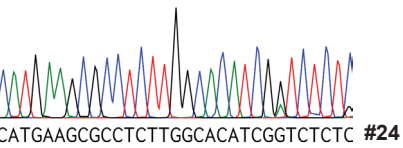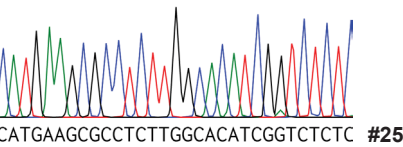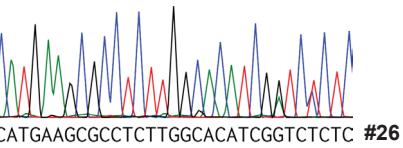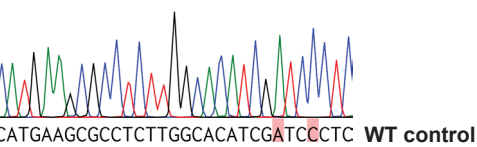

Supplement: S1 Fig — Sequencing results of the indicated blastocysts from Fig 1A. The expected DNA sequence of either the endogenous WT locus or the desired mutation (new BsaI restriction site) is depicted at the top. (PDF) [file pone.0196891.s001.pdf]
